# Supplementary material for: Ultra-high energy storage performances regulated by depletion region engineering sensitive to the electric field in PNP-type relaxor ferroelectric heterostructural films
Source: Royal Society of Chemistry journal article supplement (doi:10.1039/c9ta13951f), 2020-01-01
Supplement: c9ta13951f1.pdf [file c9ta13951f1.pdf]

### Work function information of samples derived from KPFM

Three procedures are used to judge the characteristics of the PN junctions.

**First** is to determine the relationship of the work function for the four Au, Pt, BBPT and NBLT materials by measuring the contact potential difference between the four materials and probes. The specific judgment process is as follows.

When KPFM works, the electrostatic potential around the sample and probe is equal:

$$qV_{tip} - W_{tip} = qV_{sample} - W_{sample} \quad (1)$$

where  $V_{tip}$  and  $V_{sample}$  are the tip voltage and sample voltage, respectively. And  $W_{tip}$  and  $W_{sample}$  are the work function of tip and sample, respectively.

When two different samples are measured with the same probe and ground connection, the electrostatic potential relationship is as follows:

$$qV_{tip1} - W_{tip1} = qV_{sample1} - W_{sample1} \quad (2)$$

$$qV_{tip2} - W_{tip2} = qV_{sample2} - W_{sample2} \quad (3)$$

The sample1 and 2 represent two different samples. When two samples are on the same batch of substrates and are well grounded during measurement, the following relationship will be generated:

$$q(V_{cpd1} - V_{cpd2}) = W_{sample2} - W_{sample1} \quad (4)$$

where  $V_{cpd1}$  represent the contact potential difference between the tip and sample 1, respectively. Therefore, the order of magnitude of work functions for the samples and electrodes can be derived from the contact potential difference between the tip and sample  $V_{cpd}$ . By measuring, we have conform that  $V_{cpdAu} > V_{cpdPt} > V_{cpdBBPT} > V_{cpdNBLT}$ . Thus, the order of magnitude of the sample work function is  $W_{NBLT} > W_{BBPT} > W_{Pt} > W_{Au}$ .

**Second** is the judgement of the interface barrier height between materials and electrodes. For N-type and P-type semiconductors, the formulas for the barrier heights are  $\Phi_B = W_M - \chi_S$  and  $\Phi_B = E_g - (W_M - \chi_S)$ , respectively. Therefore, the higher work function of electrode results in the higher the interface barrier height for N-type semiconductors and the lower the interface barrier height (worse leakage performance)

for P-type semiconductors.

**At last**, the conductive type can be accurately judged by combining the order of magnitude of work function information and the leakage information. As measured in the results, the leakage performance of Au/BBPT/Pt with asymmetric electrode are better than that of Au/BBPT/Au with symmetrical electrodes, and the leakage performance of Au/NBLT/Au with symmetrical electrodes is better than that of Au/NBLT/Pt. Therefore, we can determine exactly that BBPT is N-type and NBLT is P-type.

### The derivation of formula (5)

The concentrations of majority carriers in N-region and P-region are  $N_e$  and  $N_h$ , respectively. The depletion region widths of in N-region and P-region are  $\omega_p$  and  $\omega_n$ , respectively. Then the charge density in the barrier region is as follows

$$\rho(x) = -qN_h \quad (-\omega_p < \omega < 0) \quad (S1)$$

$$\rho(x) = qN_e \quad (0 < \omega < -\omega_n) \quad (S2)$$

The depletion region width of PN junctions is as follows.

$$\omega = \omega_n + \omega_p \quad (S3)$$

Because the entire semiconductor satisfies the condition of electrical neutrality, the total positive and negative charges in the depletion region are equal.

$$qN_h\omega_p = qN_e\omega_n = Q \quad (S4)$$

$Q$  is the amount of space charge accumulated per unit area on the depletion region.

The poisson equation inside the barrier region of the abrupt junction is shown in the following formula.

$$\frac{d^2V_1(\omega)}{d\omega^2} = \frac{qN_h}{\varepsilon_h\varepsilon_0} \quad (-\omega_p < \omega < 0) \quad (S5)$$

$$\frac{d^2V_2(\omega)}{d\omega^2} = -\frac{qN_e}{\varepsilon_e\varepsilon_0} \quad (0 < \omega < -\omega_n) \quad (\text{S6})$$

Where,  $V_1(x)$  and  $V_2(x)$  are the potential in the negative and positive space charge region, respectively. Integrating above formula, the following formula will be given.

$$\frac{dV_1(\omega)}{d\omega} = \frac{qN_h}{\varepsilon_h\varepsilon_0} + C_1 \quad (-\omega_p < \omega < 0) \quad (\text{S7})$$

$$\frac{dV_2(\omega)}{d\omega} = -\frac{qN_e}{\varepsilon_e\varepsilon_0} + C_2 \quad (0 < \omega < \omega_n) \quad (\text{S8})$$

Where  $C_1$  and  $C_2$  are constants, which can be determined by boundary conditions. Since it is electrically neutral outside the barrier region and the electric field is concentrated in the barrier region, the boundary condition can be obtained as follows:

$$E(-\omega_p) = -\left. \frac{dV_1(\omega)}{d\omega} \right|_{\omega=-\omega_p} = 0 \quad (\text{S9})$$

$$E(\omega_n) = -\left. \frac{dV_2(\omega)}{d\omega} \right|_{\omega=\omega_n} = 0 \quad (\text{S10})$$

According to (S7)-(S10), the following formula are obtained.

$$C_1 = \frac{qN_h\omega_p}{\varepsilon_h\varepsilon_0} \quad (\text{S11})$$

$$C_2 = \frac{qN_e\omega_n}{\varepsilon_e\varepsilon_0} \quad (\text{S12})$$

Since  $N_h\omega_p = N_e\omega_n$  and  $C_1 = C_2$ , the electric field in the barrier region can be expressed as the following formula.

$$E_1(\omega) = -\frac{dV_1(\omega)}{d\omega} = -\frac{qN_h(\omega + \omega_p)}{\varepsilon_h\varepsilon_0} \quad (-\omega_p < \omega < 0) \quad (\text{S13})$$

$$E_2(\omega) = -\frac{dV_2(\omega)}{d\omega} = \frac{qN_e(\omega + \omega_n)}{\varepsilon_e\varepsilon_0} \quad (0 < \omega < \omega_n) \quad (\text{S14})$$

Where,  $E_1(\omega)$  and  $E_2(\omega)$  are the electric field intensity in the negative and positive

space charge region, respectively. Integrating the formulas (S13) and (S14), it gets the potential in the barrier.

$$V_1(\omega) = \left(\frac{qN_h}{2\varepsilon_h\varepsilon_0}\right)\omega^2 + \left(\frac{qN_h\omega_p}{\varepsilon_h\varepsilon_0}\right)\omega + D_1 \quad (-\omega_p < \omega < 0) \quad (\text{S15})$$

$$V_2(\omega) = -\left(\frac{qN_e}{2\varepsilon_e\varepsilon_0}\right)\omega^2 + \left(\frac{qN_e\omega_n}{\varepsilon_e\varepsilon_0}\right)\omega + D_2 \quad (0 < \omega < \omega_n) \quad (\text{S16})$$

If the potential in the P-type neutral region is zero, the boundary condition under the thermal equilibrium condition is:

$$V_1(-\omega_p) = 0 \quad V_2(\omega_n) = V_D \quad (\text{S17})$$

Substituting formula (S17) into formula (S15) and (S16) to get:

$$D_1 = \frac{qN_h\omega_p^2}{2\varepsilon_h\varepsilon_0} \quad D_2 = V_D - \frac{qN_e\omega_n^2}{2\varepsilon_e\varepsilon_0} \quad (\text{S18})$$

Because the potential is 0 at  $\omega=0$ , the potential is continuous everywhere, thus  $V_1(0)=V_2(0)$ . Put  $D_1$  and  $D_2$  into formula(S19) and (S20).

$$V_1(\omega) = \left(\frac{qN_h(\omega^2 + \omega_p^2)}{2\varepsilon_h\varepsilon_0}\right) + \left(\frac{qN_h\omega_p\omega}{\varepsilon_h\varepsilon_0}\right) \quad (-\omega_p < \omega < 0) \quad (\text{S19})$$

$$V_2(\omega) = V_D - \left(\frac{qN_e(\omega^2 + \omega_n^2)}{2\varepsilon_e\varepsilon_0}\right) + \left(\frac{qN_e\omega_n\omega}{\varepsilon_e\varepsilon_0}\right) \quad (0 < \omega < \omega_n) \quad (\text{S20})$$

Due to  $V_1(0)=V_2(0)$ , the depletion region width of PN junction can be estimated using following formulas:

$$V_D - \left(\frac{qN_e(\omega_n^2)}{2\varepsilon_e\varepsilon_0}\right) = \left(\frac{qN_h(\omega_p^2)}{2\varepsilon_h\varepsilon_0}\right) \quad (\text{S21})$$

When an electric field applied, an expression for the width of the depletion region is obtained.

$$\omega_{PN} = \sqrt{\frac{2\varepsilon_0\varepsilon_e\varepsilon_h(V_D - V)}{q} \times \frac{(N_e + N_h)^2}{N_eN_h(N_h\varepsilon_h + N_e\varepsilon_e)}} \quad (\text{S22})$$

Table S1 Dielectric, ferroelectric and energy storage properties of some Aurivillius bismuth layer structured ferroelectric films.

| Materials (films)                                                         | $\epsilon_r$ | $E_{\max}$<br>(kV/cm) | $P_{\max}$<br>( $\mu\text{C}/\text{cm}^2$ ) | $P_{\max}/E_{\max}$<br>( $\mu\text{C}/\text{kV}/\text{cm}$ ) | $U_{\text{re}}/E_{\max}$<br>( $\text{J}/\text{cm}^2/\text{kV}$ ) | Ref.      |
|---------------------------------------------------------------------------|--------------|-----------------------|---------------------------------------------|--------------------------------------------------------------|------------------------------------------------------------------|-----------|
| $\text{Bi}_{3.25}\text{La}_{0.75}\text{Ti}_3\text{O}_{12}$                | 290          | 2040                  | 60                                          | 0.029                                                        | 0.022                                                            | 1         |
| $\text{BaBi}_4\text{Ti}_4\text{O}_{15}$                                   | 325          | 2000                  | 50                                          | 0.025                                                        | 0.022                                                            | 2         |
| $\text{Ba}_2\text{Bi}_4\text{Ti}_5\text{O}_{18}$                          | 225          | 2340                  | 39                                          | 0.0167                                                       | 0.016                                                            | 3         |
| $\text{Sr}_2\text{Bi}_4\text{Ti}_5\text{O}_{18}$                          | 165          | 2150                  | 23                                          | 0.01069                                                      | 0.008                                                            | 3         |
| $\text{BaTiO}_3\text{-Bi}_{3.25}\text{La}_{0.75}\text{Ti}_3\text{O}_{12}$ | 180          | 2800                  | 42                                          | 0.015                                                        | 0.019                                                            | 4         |
| $\text{Na}_{0.5}\text{Bi}_{3.25}\text{La}_{1.25}\text{Ti}_4\text{O}_{15}$ | 330          | 3300                  | 72                                          | 0.022                                                        | 0.022                                                            | This work |
| $\text{BaBi}_{3.4}\text{Pr}_{0.6}\text{Ti}_4\text{O}_{15}$                | 423          | 2049                  | 87                                          | 0.0425                                                       | 0.0419                                                           | This work |

## References

- [1] B. Yang, M. Guo, D. Song, X. Tang, R. Wei, L. Hu, J. Yang, W. Song, J. Dai, X. Lou, X. Zhu, Y. Sun,  $\text{Bi}_{3.25}\text{La}_{0.75}\text{Ti}_3\text{O}_{12}$  thin film capacitors for energy storage applications. *Appl. Phys. Lett.* 2017, 111, 183903.
- [2] D. Song, J. Yang, B. Yang, Y. Wang, L. Chen, F. Wang, X. Zhu, Energy storage in thin films with high efficiency. *J. Appl. Phys.* 2019, 125, 134101.
- [3] B. Yang, M. Guo, X. Tang, R. Wei, L. Hu, J. Yang, W. Song, J. Dai, X. Lou, X. Zhu, Y. Sun, Lead-free  $\text{A}_2\text{Bi}_4\text{Ti}_5\text{O}_{18}$  thin film capacitors (A = Ba and Sr) with large energy storage density, high efficiency, and excellent thermal stability, *J. Mater. Chem. C*, 2019, 7, 1888.
- [4] B. Yang, M. Guo, D. Song, X. Tang, R. Wei, L. Hu, J. Yang, W. Song, J. Dai, X. Lou, X. Zhu, Y. Sun, Energy storage properties in  $\text{BaTiO}_3\text{-Bi}_{3.25}\text{La}_{0.75}\text{Ti}_3\text{O}_{12}$  thin films, *Appl. Phys. Lett.* 2018, 113, 18390.
